# Supplementary material for: A new scandium based catalyst for the green synthesis of polyols-polyesters starting from waste raw materials
Source: Royal Society of Chemistry journal article supplement (doi:10.1039/d4gc03033h), 2024-01-01
Supplement: d4gc03033h1.pdf [file d4gc03033h1.pdf]

## Supplemental informations

For

### **New Scandium Based Catalyst for the Green Synthesis of Polyols-Polyesters Starting from Waste Raw Materials**

Onofrio Losito,<sup>a</sup> Lorenzo Veronico,<sup>a</sup> Alessia De Cataldo,<sup>b</sup> Michele Casiello,<sup>c</sup> Caterina Fusco,<sup>c</sup> Luigi Gentile,<sup>a</sup> Ernesto Mesto,<sup>d</sup> Emanuela Schingaro,<sup>d</sup> Lucia D'Accolti\*<sup>a, c</sup>

<sup>a</sup>Chemistry Department University of Bari via Orabona, 4. 70126 Bari, Italy

<sup>b</sup>Aerospace Sciences And Engineering (Inter-University Ph.D.) Polytechnic of Bari and University Of Bari Aldo Moro, Via Orabona 4, 70126 Bari, Italy.

<sup>c</sup>CNR-ICCOM, SS Bari via Orabona 4, 70126 Bari, Italy

<sup>d</sup>Dipartimento di Scienze della Terra e Geoambientali, Università degli Studi di Bari Aldo Moro, Via Edoardo Orabona 4, 70125 Bari, Italy

**(21 pages including the cover)**

---

#### **Table of Contents**

|                                                                |     |
|----------------------------------------------------------------|-----|
| List of abbreviation                                           | S2  |
| EDS analysis of the catalyst                                   | S3  |
| Magnification of SEM images of Figure 4                        | S5  |
| Table S1. Parameters of XRD characterization for the catalysts | S7  |
| Table S2 Catalyst screening reactions                          | S8  |
| GPC analysis of representative samples of polyol-polyester     | S9  |
| EDS analysis and composition Sc. A.T. after III cycles         | S11 |
| TGA and DTG of the polymers                                    | S12 |
| <sup>1</sup> H NMR insert analysis of <b>GSA-03</b> polymer    | S15 |
| <sup>13</sup> C NMR analysis of <b>GSA-03</b> polymer          | S16 |
| Additional analysis of HRMS                                    | S17 |
| ATR-FT-IR of the ink                                           | S19 |
| Certification Analysis of crude glycerol                       | S20 |
| Picture of reaction                                            | S21 |
| Additional References                                          | S21 |

**List of abbreviations:** **GSX-XX** (Samples obtained from Glycerol and succinic acid), **GSA-XX** (Samples obtained from Glycerol and Succinic acid with **Sc-A.T.** catalyst), **GSB-XX** (Samples obtained from Glycerol and Succinic acid with **Sc(III)O-KIT-6**), **GSN-XX** (Samples obtained from Glycerol and Succinic acid with no catalyst), **GSA-03N** (sample obtained in Nitrogen atmosphere), **GSA-03V** (sample obtained in vacuum), **GSA-03D** (sample obtained with glycerol 70% purity), **GSA-03Sc**, **GSR-XX** (Samples obtained from Glycerol and Succinic acid using commercial  $\text{Sc}_2\text{O}_3$  and  $\text{Sc}(\text{OTf})_3$  as catalyst).

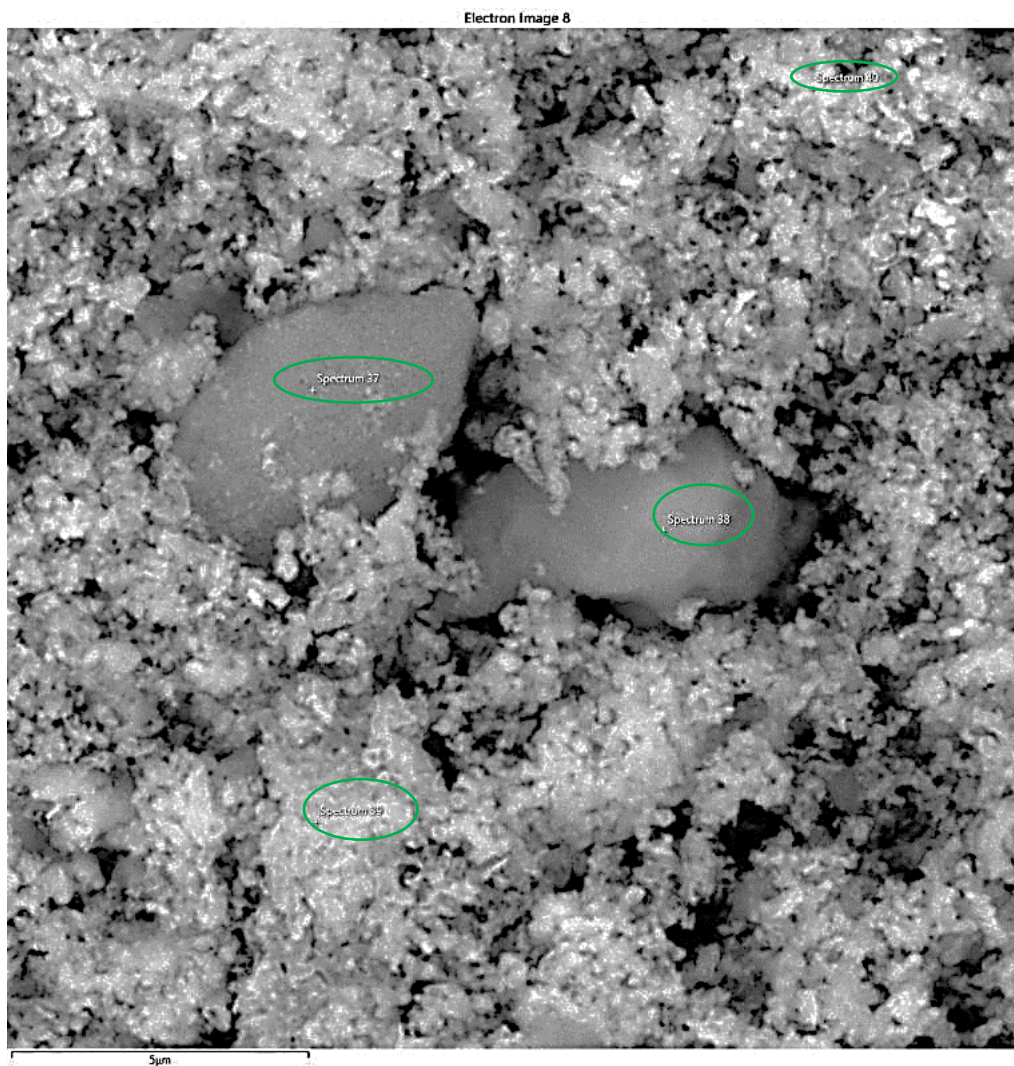

| Label              | O     | Al   | Si    | S    | K    | Sc    | Fe   | Total W% |
|--------------------|-------|------|-------|------|------|-------|------|----------|
| <b>Spectrum 37</b> | 21.08 |      | 22.10 | 0.95 | 0.31 | 54.93 | 0.63 | 100.00   |
| <b>Spectrum 38</b> | 36.24 |      | 39.06 | 0.49 | 0.22 | 24.00 |      | 100.00   |
| <b>Spectrum 39</b> | 29.32 |      | 21.67 | 0.82 | 0.26 | 47.92 |      | 100.00   |
| <b>Spectrum 40</b> | 31.12 | 0.25 | 16.97 | 0.68 | 0.20 | 50.36 | 0.42 | 100.00   |

**Figure S1.** EDS analysis and composition Sc(III)O-KIT-6 catalyst before NaOH treatment

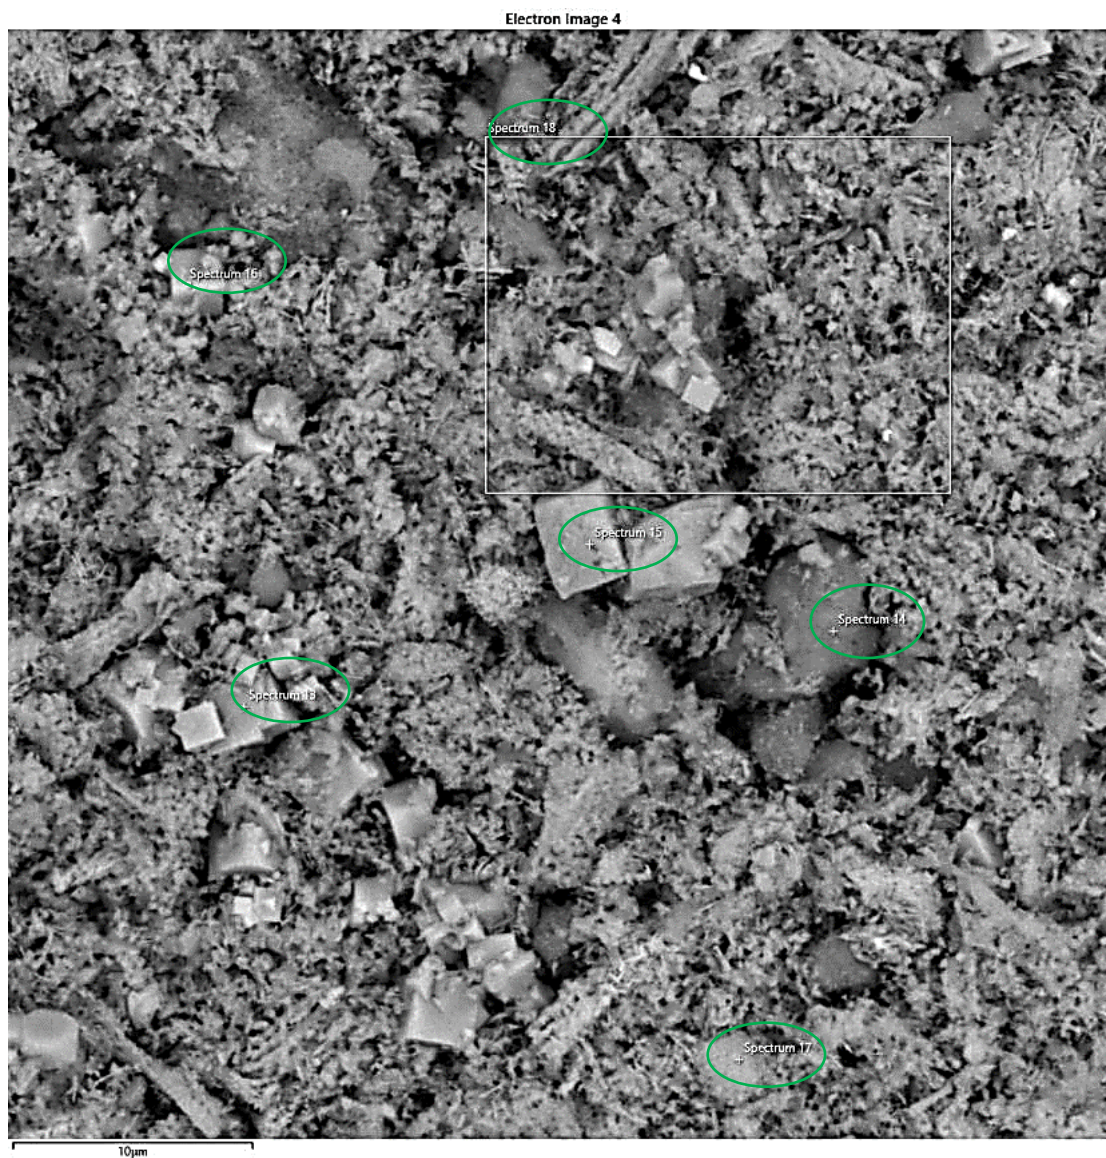

| Label              | O     | Al   | Si    | S    | K    | Ca   | Sc    | Total W% |
|--------------------|-------|------|-------|------|------|------|-------|----------|
| <b>Spectrum 13</b> | 10.69 | 0.41 | 0.89  |      |      |      | 88.01 | 100.00   |
| <b>Spectrum 14</b> | 20.20 |      | 28.05 | 0.44 | 5.66 | 2.53 | 43.12 | 100.00   |
| <b>Spectrum 15</b> | 6.95  | 0.46 | 0.59  |      |      |      | 91.83 | 100.00   |
| <b>Spectrum 16</b> | 23.51 | 0.33 | 2.54  |      | 0.22 |      | 73.40 | 100.00   |
| <b>Spectrum 17</b> | 22.13 |      | 10.05 | 0.45 | 0.32 |      | 67.05 | 100.00   |
| <b>Spectrum 18</b> | 16.81 | 0.27 | 11.76 | 0.45 | 0.38 |      | 69.92 | 100.00   |

**Figure S2.** EDS analysis and composition **Sc. A.T.** after NaOH treatment.

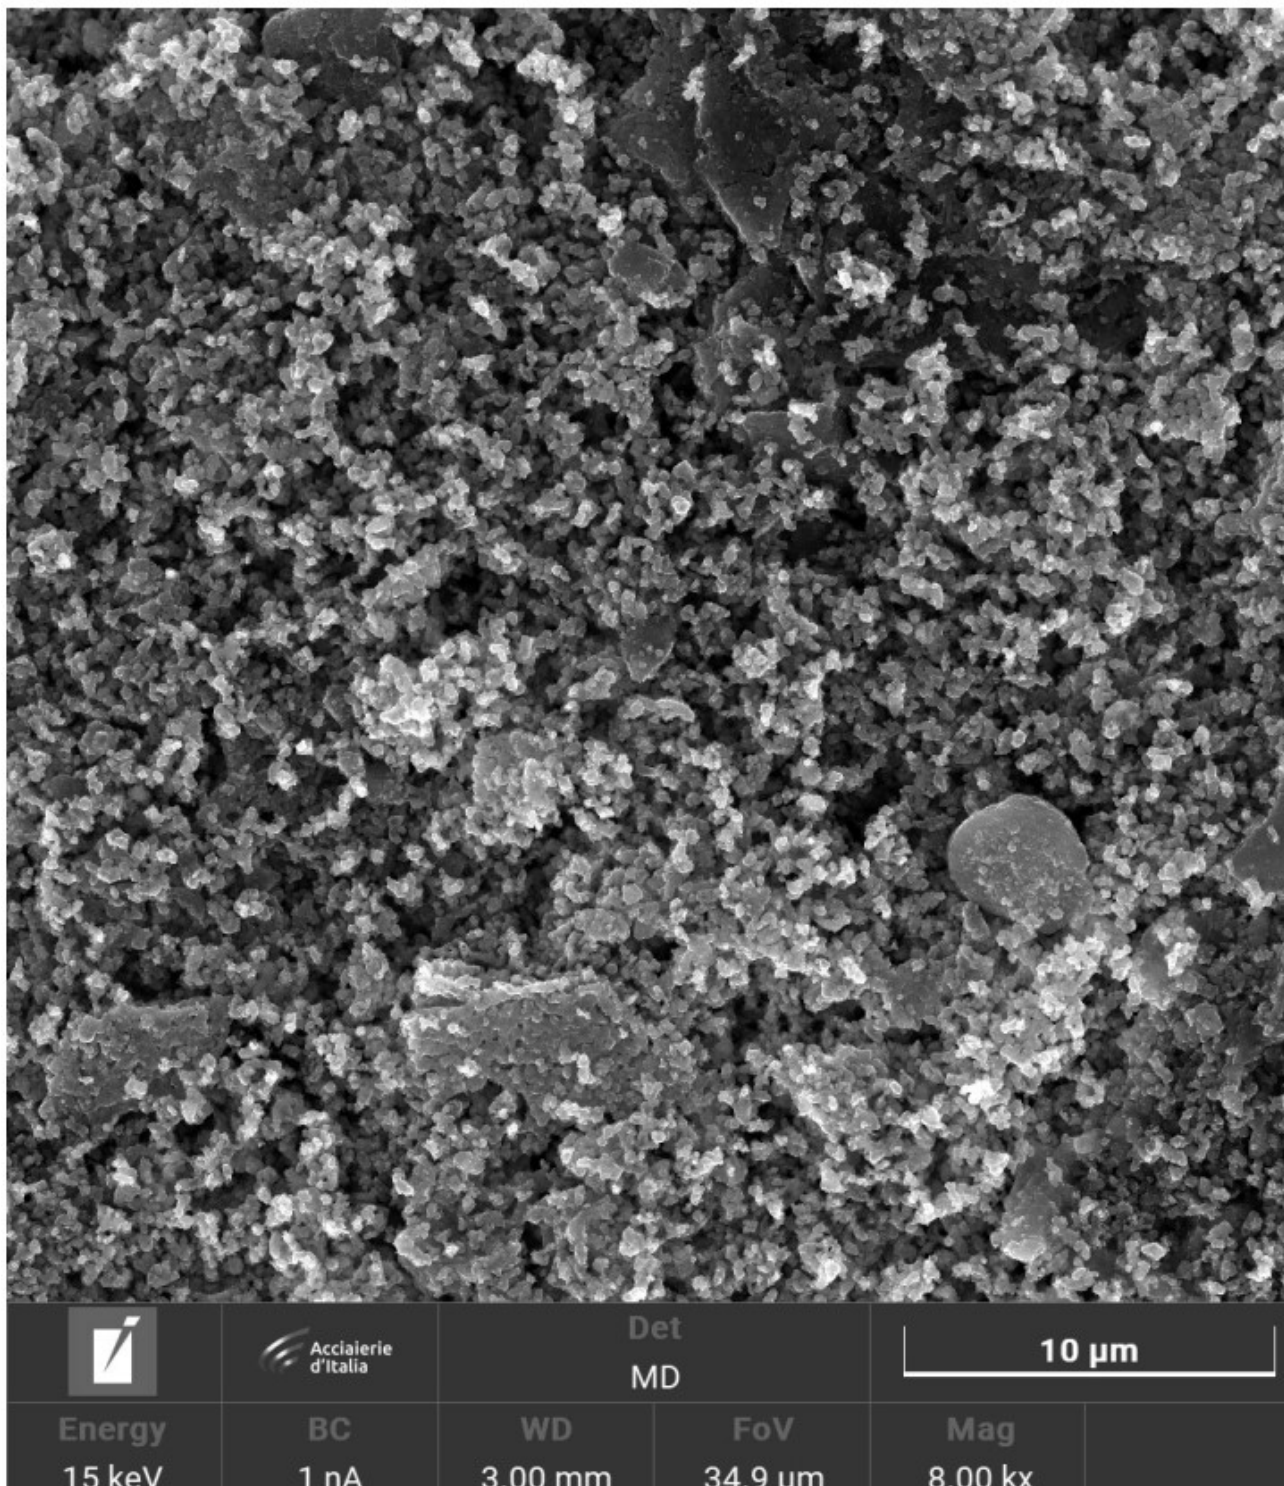

**Figure S3.** Magnification of SEM image at 10 μm Sc(III)O-KIT-6 before NaOH treatment

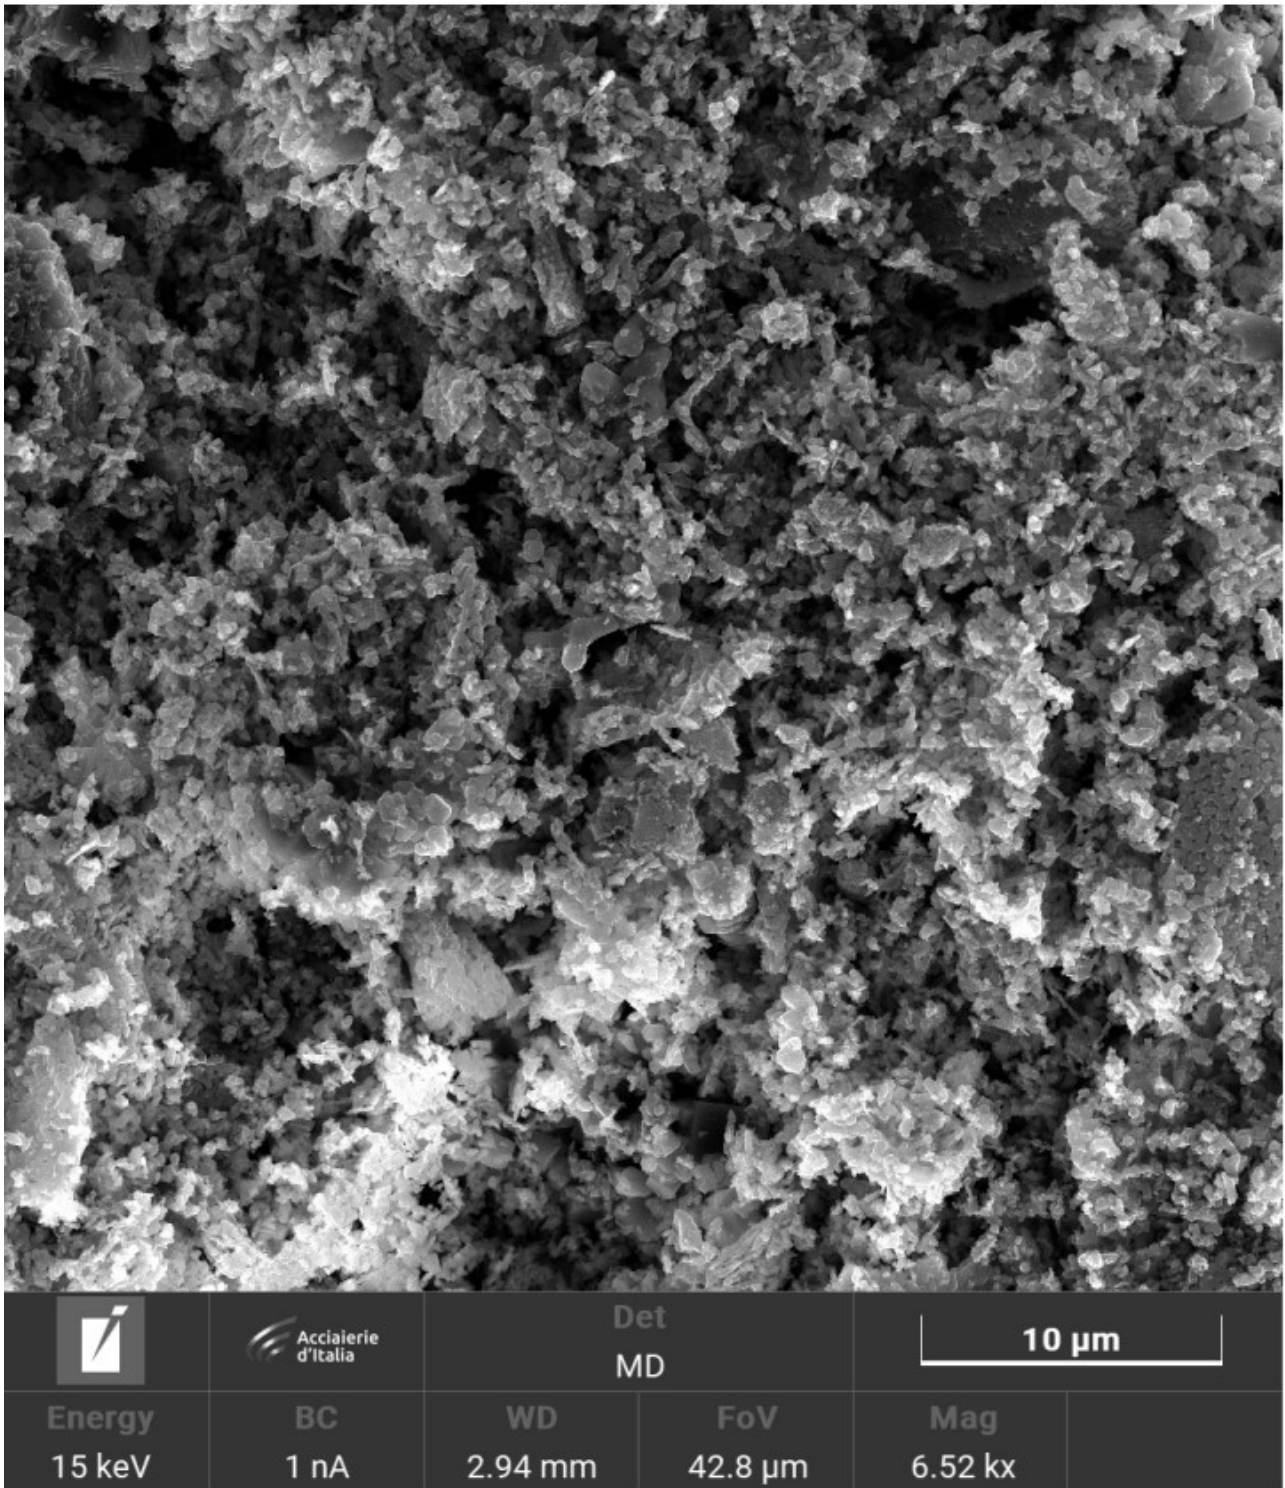

**Figure S4.** Magnification of SEM image at 10 μm of the Sc. A.T. after NaOH treatment.

**Table S1.** Parameters of XRD characterization for the catalysts

|                                                  | Literature data | Catalysts  |               |            |            |
|--------------------------------------------------|-----------------|------------|---------------|------------|------------|
| Parameters                                       | Ref XX in paper | Sc2O3      | Sc(III)-KIT 6 | SC A T     | SC A T m   |
| <b>Sc2O3</b>                                     |                 |            |               |            |            |
| <b>Unit Cell Parameters</b>                      |                 |            |               |            |            |
| <b>a (Å)</b>                                     | 9,81            | 9.8462(6)  | 9.849(1)      | 9.8419(4)  | 9.859(2)   |
| <b>Volume (Å<sup>3</sup>)</b>                    | 930,704         | 954.57(17) | 955.38(29)    | 953.32(12) | 958.29(58) |
| <b>Bond Distances (Å)</b>                        |                 |            |               |            |            |
| <b>Sc1-O (x6)</b>                                | 2,12            | 2,130      | 2,131         | 2,129      | 2,133      |
|                                                  |                 |            |               |            |            |
| <b>Sc2-O (x2)</b>                                | 2,16            | 2,087      | 2,088         | 2,086      | 2,090      |
| <b>Sc2-O' (x2)</b>                               | 2,08            | 2,100      | 2,101         | 2,093      | 2,103      |
| <b>Sc2-O'' (x2)</b>                              | 2,09            | 2,171      | 2,171         | 2,170      | 2,173      |
| <b>&lt;Sc2-O&gt;</b>                             | 2,11            | 2,119      | 2,120         | 2,116      | 2,122      |
| <b>Sc<sub>2</sub>Si<sub>2</sub>O<sub>7</sub></b> |                 |            |               |            |            |
| <b>Unit Cell Parameters</b>                      |                 |            |               |            |            |
| <b>a (Å)</b>                                     | 6,56            |            | 6.516(1)      | 6.5046(4)  | 6.49(1)    |
| <b>b (Å)</b>                                     | 8,58            |            | 8.512(1)      | 8.5087(6)  | 8.58(2)    |
| <b>c (Å)</b>                                     | 4,74            |            | 4.6950(8)     | 4.6902(4)  | 4.693(8)   |
| <b>β (°)</b>                                     | 103,83          |            | 102.78(1)     | 102.737(4) | 103.1(1)   |
| <b>Volume (Å<sup>3</sup>)</b>                    | 259,52          |            | 253.95(7)     | 253.19(3)  | 254.53(84) |
|                                                  |                 |            |               |            |            |
| <b>Bond Distances (Å)</b>                        |                 |            |               |            |            |
| <b>Sc-O2</b>                                     | 2.162(1)        |            | 2,140         | 2,139      | 2,147      |
| <b>Sc-O3</b>                                     | 2.124(2)        |            | 2,088         | 2,086      | 2,086      |
| <b>Sc-O3'</b>                                    | 2.234(2)        |            | 2,212         | 2,208      | 2,210      |
| <b>&lt;Sc-O&gt;</b>                              | 2,173           |            | 2,146         | 2,144      | 2,148      |
|                                                  |                 |            |               |            |            |
| <b>Si-O1</b>                                     | 1.608(1)        |            | 1,583         | 1,580      | 1,580      |
| <b>Si-O2</b>                                     | 1.624(2)        |            | 1,606         | 1,605      | 1,589      |
| <b>Si-O3 (x2)</b>                                | 1.631(2)        |            | 1,619         | 1,628      | 1,628      |
| <b>&lt;Si-O&gt;</b>                              | 1,623           |            | 1,607         | 1,610      | 1,606      |

**Table S2.** Catalyst scope in the polymerization of glycerol and succinic acid under solvent free conditions.<sup>a</sup>

| <i>Entry</i> | <i>Catalyst (mg)*</i>          | <i>T (°C)</i> | <i>Time (h)</i> | <i>Polyester Label</i>    | <i>M<sub>w1</sub> (Da)/ Selectivity (%)<sup>d</sup></i> | <i>P.D.<sub>1</sub></i> | <i>M<sub>w2</sub></i> | <i>P.D.<sub>2</sub></i> | <i>M<sub>w3</sub></i> | <i>P.D.<sub>3</sub></i> |
|--------------|--------------------------------|---------------|-----------------|---------------------------|---------------------------------------------------------|-------------------------|-----------------------|-------------------------|-----------------------|-------------------------|
| 1            | none                           | 180           | 2               | <b>GS-N01<sup>b</sup></b> | ---- <sup>c</sup>                                       | -----                   |                       |                         |                       |                         |
| 2            | none                           | 150           | 2               | <b>GS-N02</b>             | 15,592 / 8                                              | 1.13                    | 805 / 92              |                         |                       |                         |
| 3            | La-B.T. (120)                  | 150           | 2               | <b>GS-B01</b>             | 1,458 / 92 <sup>e</sup>                                 | 1.37                    |                       |                         |                       |                         |
| 4            | Sc-B.T. (120)                  | 150           | 2               | <b>GSB02</b>              | 18,389/10                                               | 1.008                   | 5,345/7               | 1.09                    | 642/12                | 1.007                   |
| 5            | Sc-B.T. (120)                  | 120           | 2               | <b>no reaction</b>        | ---                                                     | -----                   |                       |                         |                       |                         |
| 6            | Sc-A.T. (120)                  | 120           | 2               | <b>GS-A01</b>             | 27,643 / 65 <sup>e</sup>                                | 2.2                     |                       |                         |                       |                         |
| 7            | Sc(OTf) <sub>3</sub> (25)      | 120           | 2               | <b>GS-R01</b>             | 2,408 / 56                                              | 1.06                    | 448 / 43              | 1.03                    |                       |                         |
| +8           | Sc <sub>2</sub> O <sub>3</sub> | 120           | 2               | <b>GS-R02</b>             | 1,655 / 90 <sup>e</sup>                                 | 4.06                    |                       |                         |                       |                         |

<sup>a</sup> Ratio Succinic acid/Glycerol (w/w) 2:1, <sup>b</sup>Valerio et al., 2015, <sup>c</sup>Determined using the GPC analysis, <sup>d</sup>Polyethers tetramer of glycerol Mw 315 (Mw-H<sup>+</sup>)



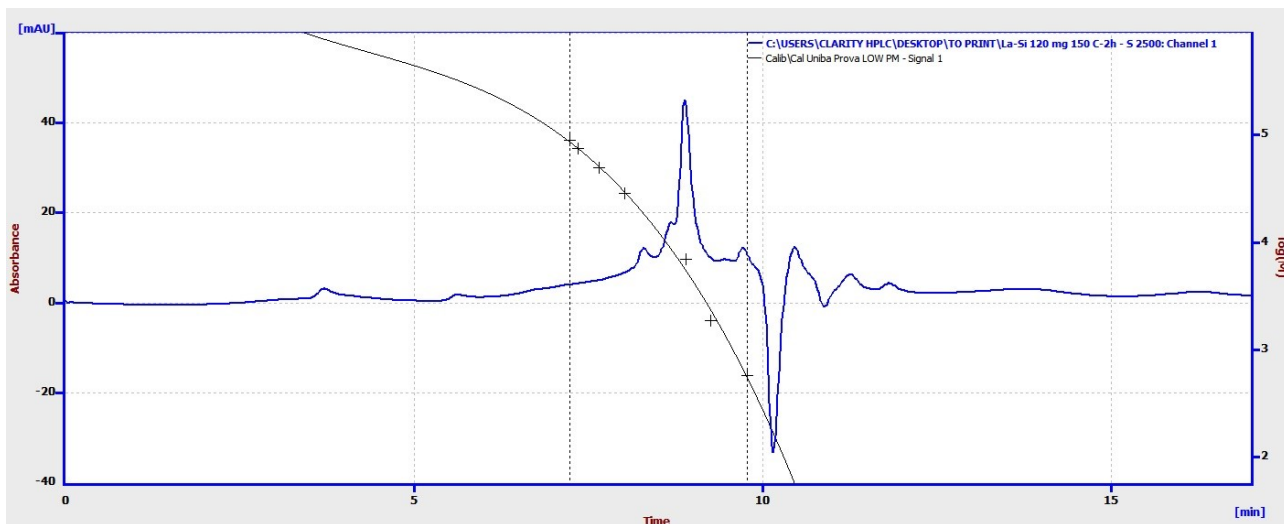

**Figure S5.** GPC analysis of sample **GSB-01**

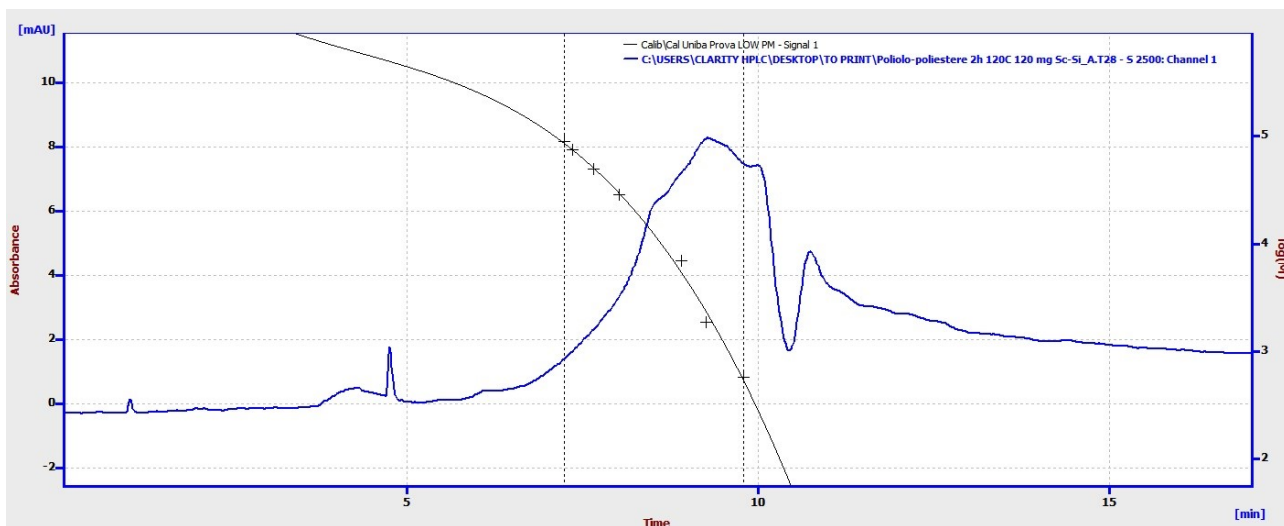

**Figure S6.** GPC analysis of sample **GSA-01**

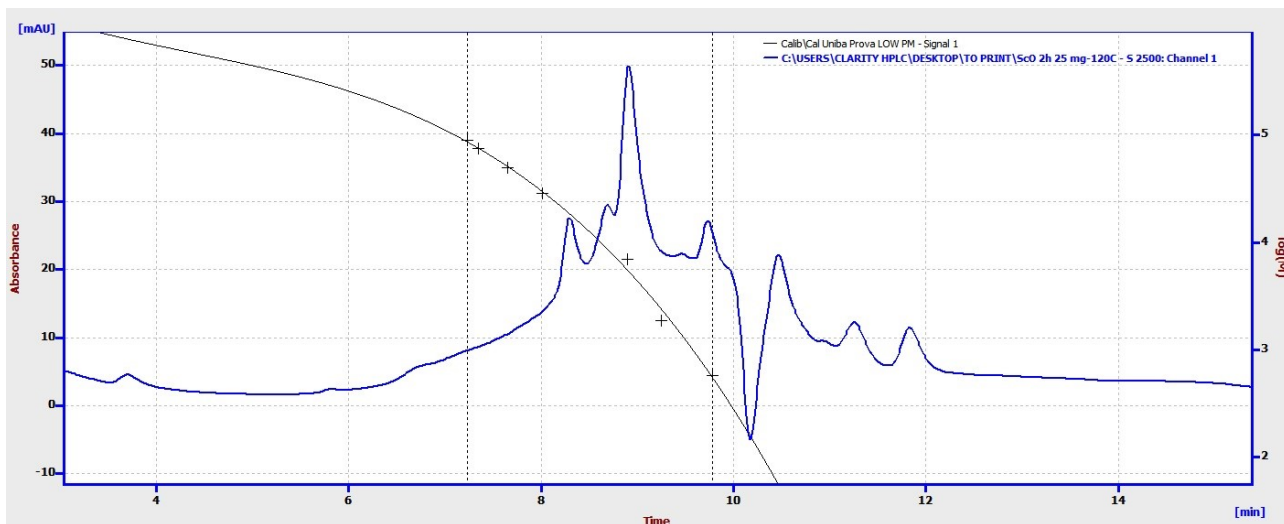

**Figure S7.** GPC analysis of sample **GSA-03**

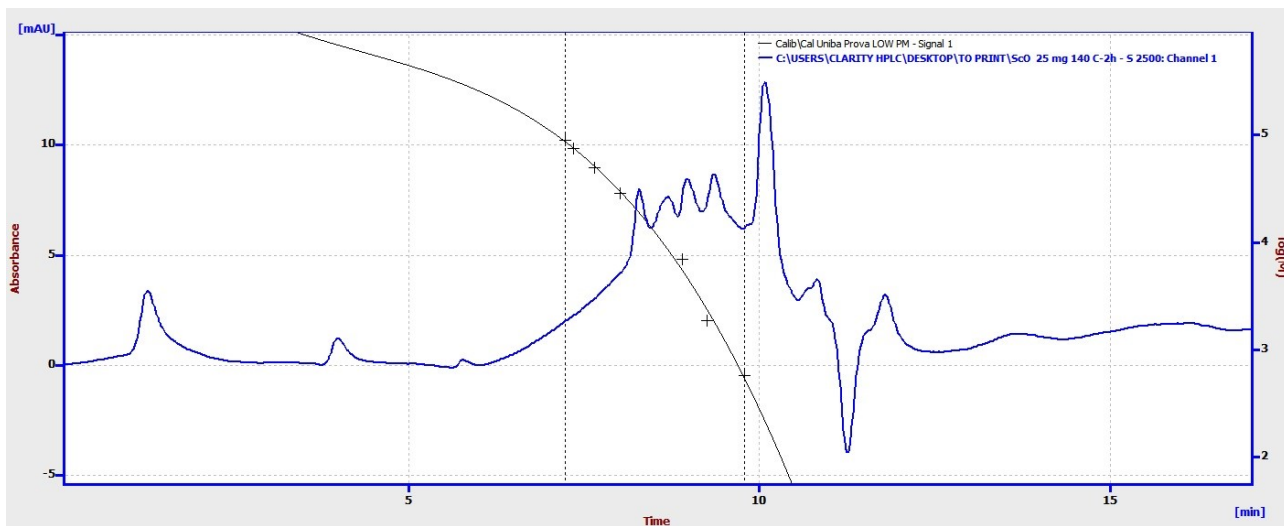

**Figure S8.** GPC analysis of sample **GSA-05**

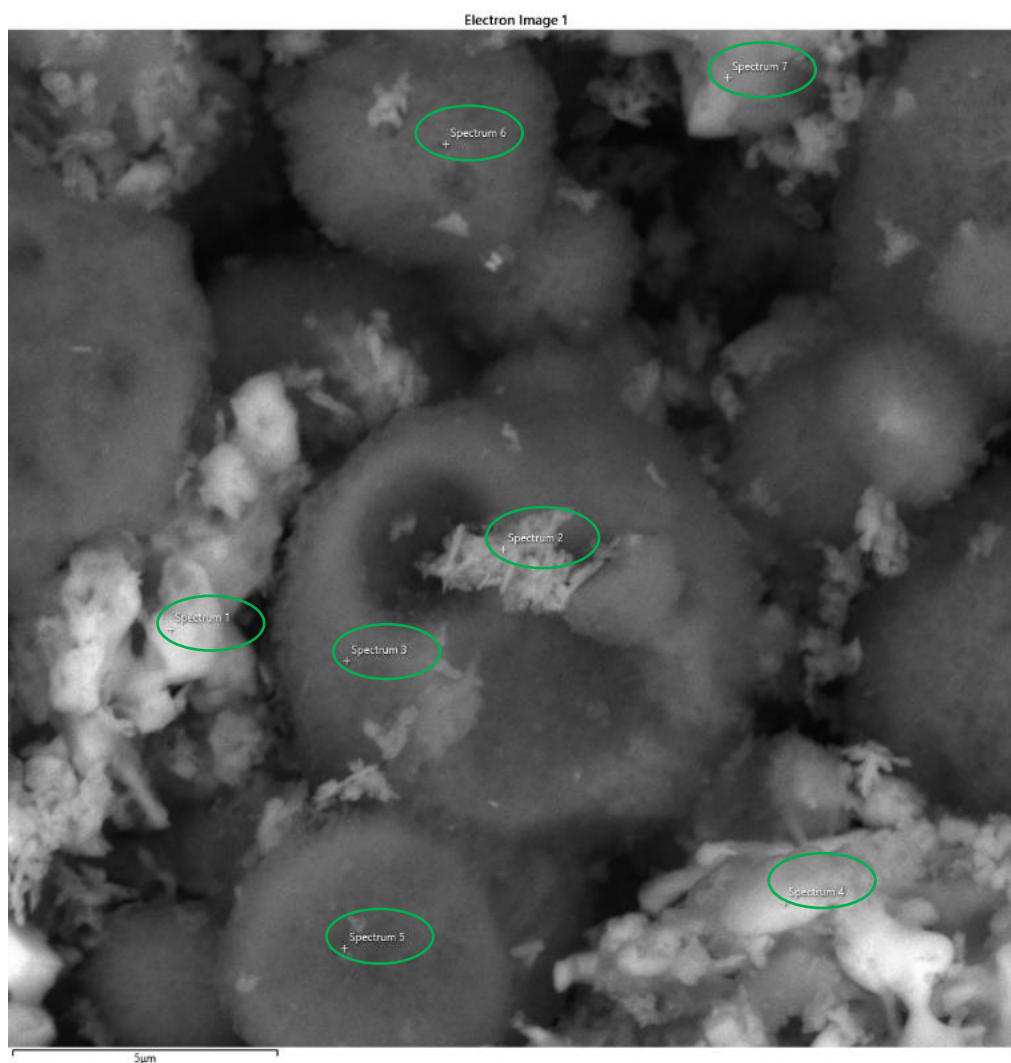

| Label             | O     | Na    | Al   | Si    | S    | K    | Ca   | Sc    | Fe   | Total W% |
|-------------------|-------|-------|------|-------|------|------|------|-------|------|----------|
| <b>Spectrum 1</b> | 32.57 | 2.14  | 1.33 | 18.52 | 0.78 |      |      | 44.23 | 0.42 | 100.00   |
| <b>Spectrum 2</b> | 32.89 | 20.05 |      | 1.58  |      |      | 0.42 | 45.06 |      | 100.00   |
| <b>Spectrum 3</b> | 30.33 | 51.83 | 0.53 | 4.66  |      |      | 0.66 | 12.00 |      | 100.00   |
| <b>Spectrum 4</b> | 34.06 | 2.38  | 2.64 | 16.36 |      | 0.21 |      | 43.67 | 0.68 | 100.00   |
| <b>Spectrum 5</b> | 34.84 | 48.68 |      | 2.31  |      |      | 0.59 | 13.59 |      | 100.00   |
| <b>Spectrum 6</b> | 27.06 | 55.69 |      | 2.60  |      |      | 1.23 | 13.42 |      | 100.00   |
| <b>Spectrum 7</b> | 6.77  | 3.05  | 0.19 | 1.71  | 0.31 |      |      | 86.71 | 1.26 | 100.00   |

**Figure S9.** EDS analysis and composition **Sc. A.T.** after III cycles

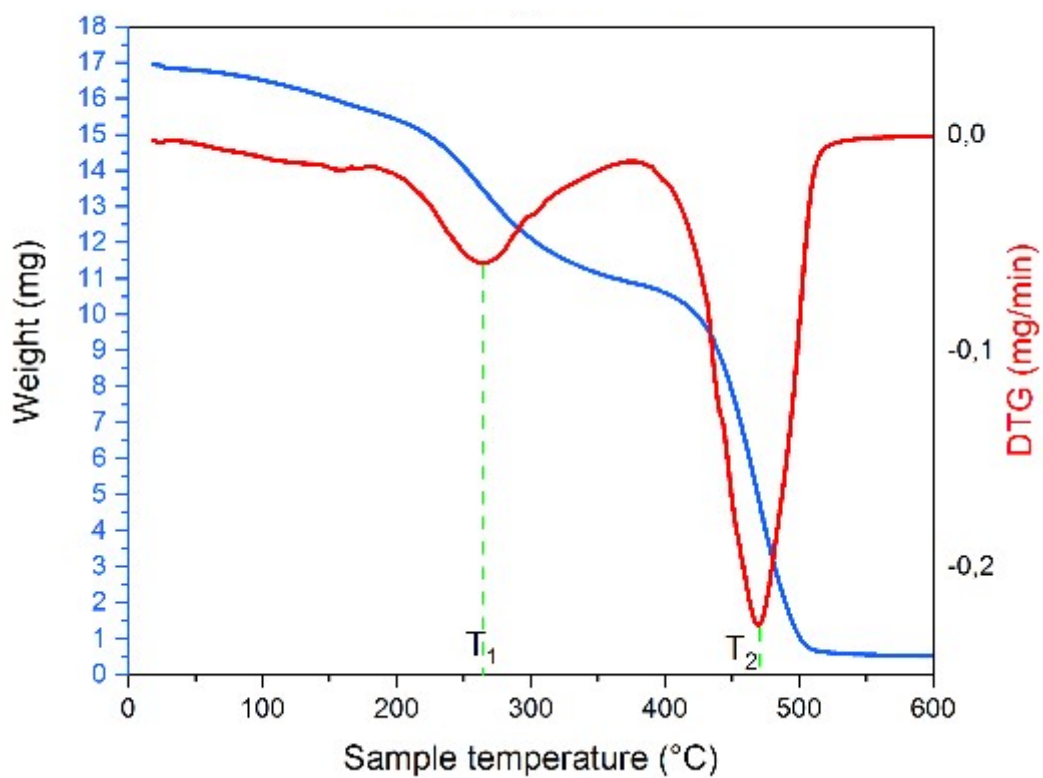

Figure S10. TGA and DTG of GSA-02 polymer.

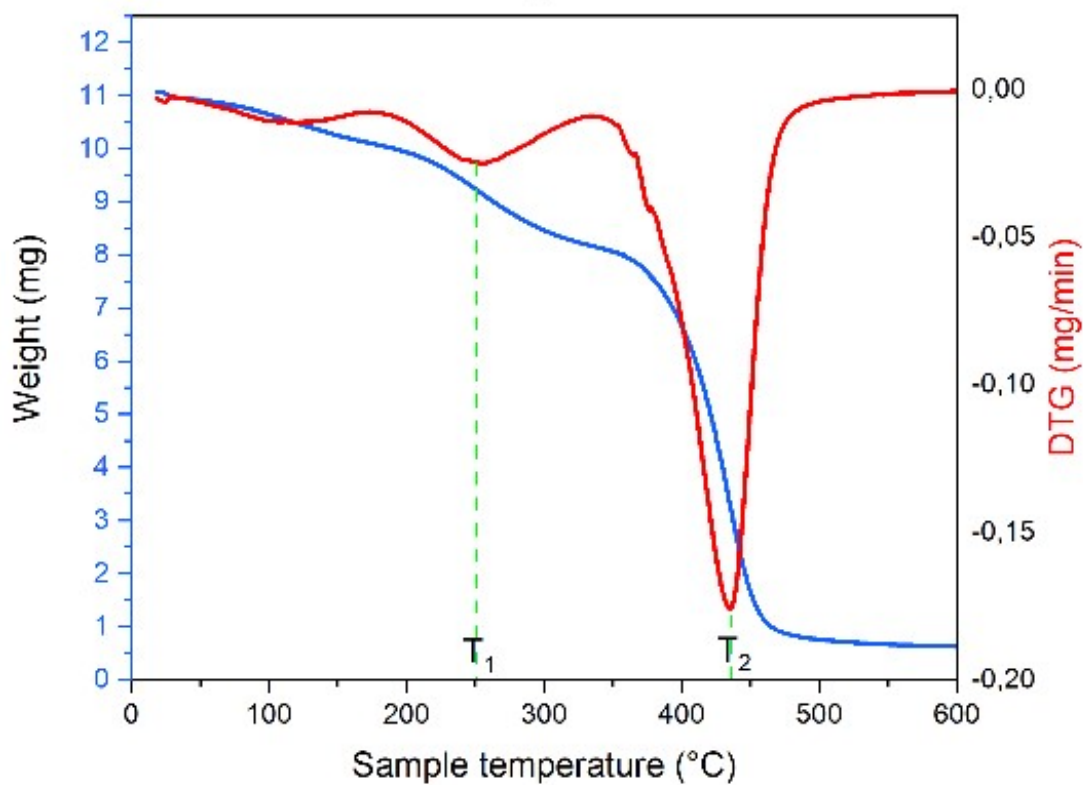

Figure S11. TGA and DTG of GSA-03 polymer.

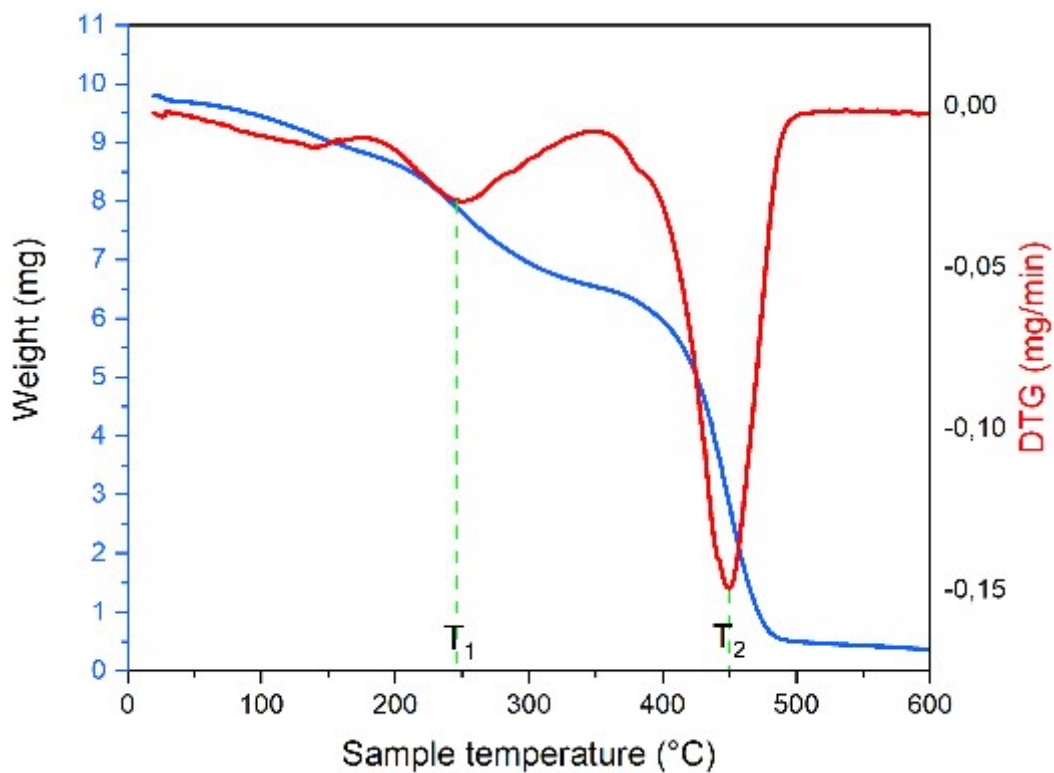

Figure S12. TGA and DTG of GSA-04 polymer.

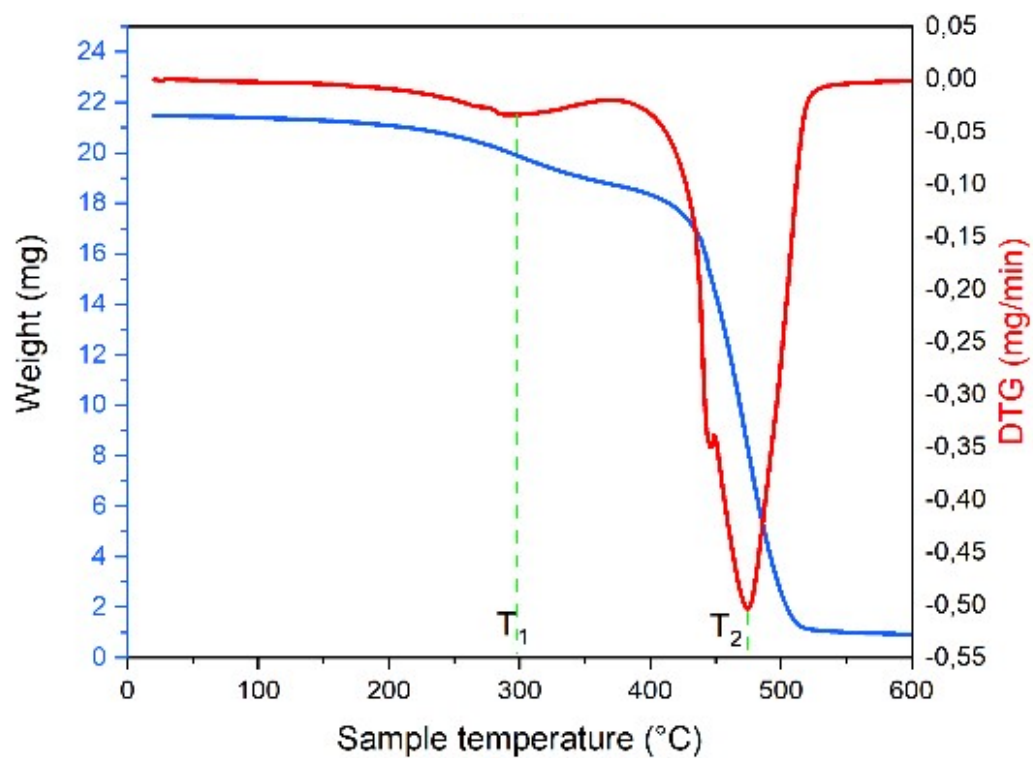

Figure S13. TGA and DTG of GSA-05 polymer.

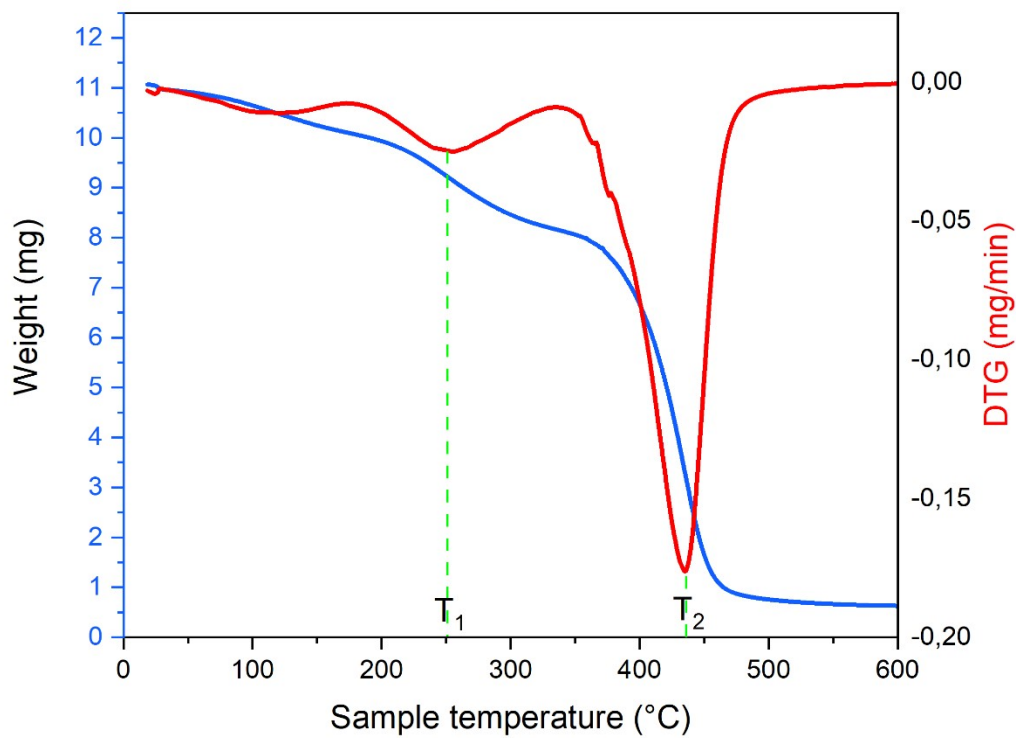

Figure S14. TGA and DTG of GSA-06 polymer.

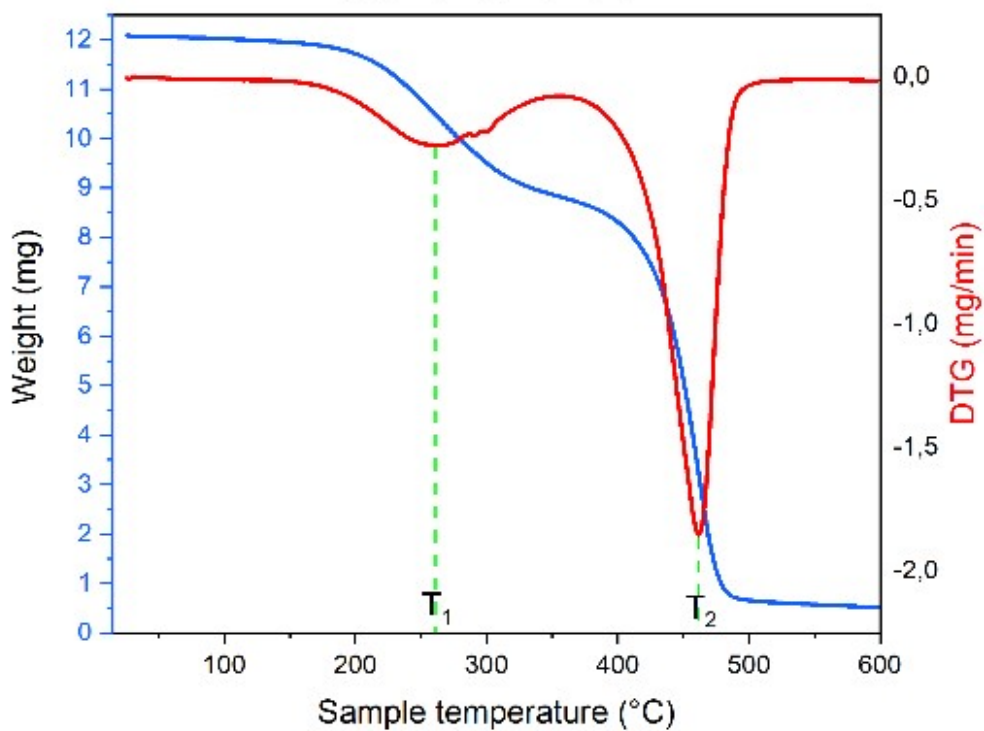

Figure S15. TGA and DTG of GSA-07 polymer.

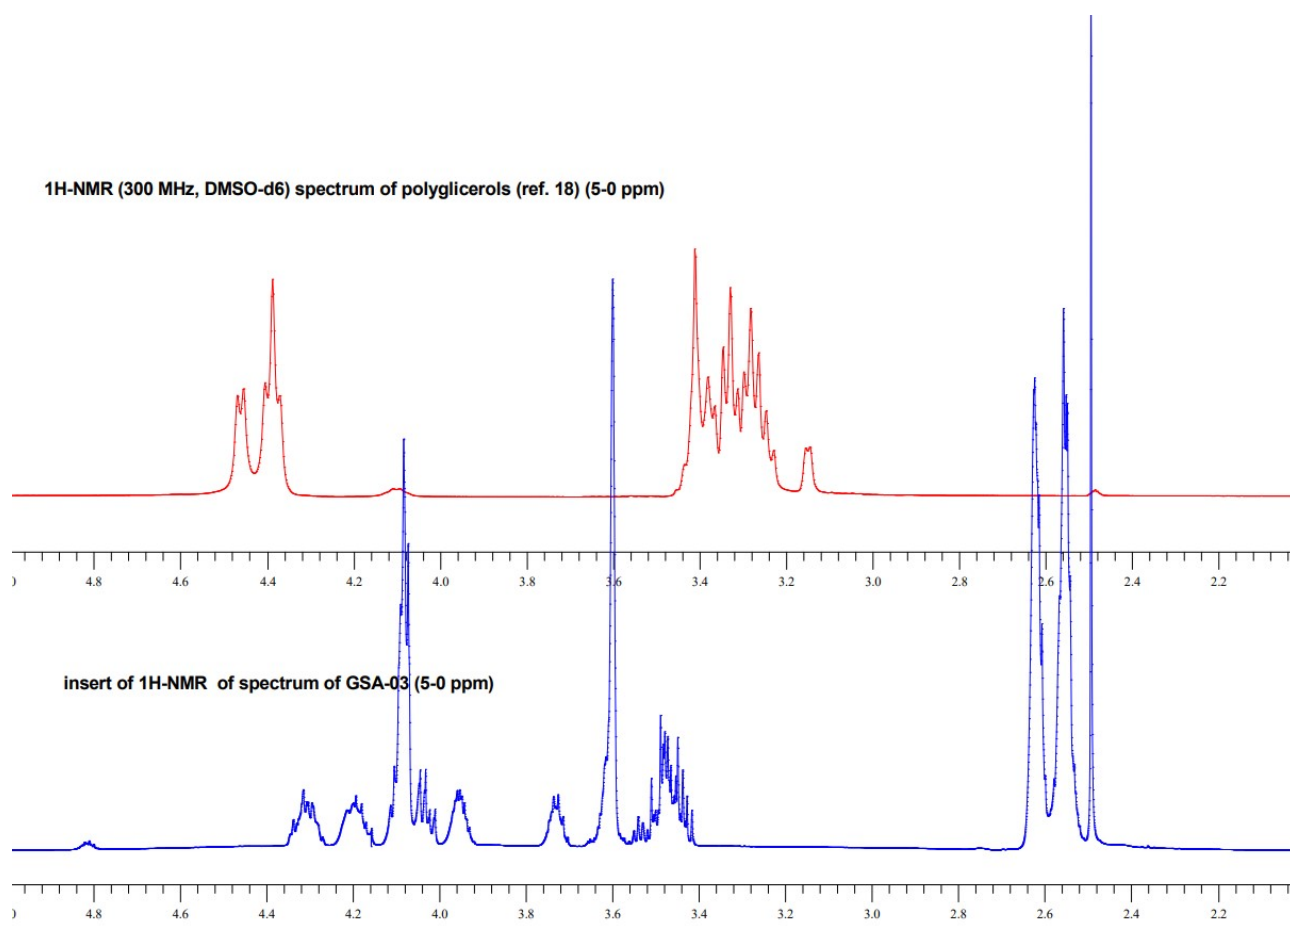

**Figure S16.**  $^1\text{H-NMR}$  of GSA-03 (0-5 ppm, blue line) vs polyol-polyether from reference 18

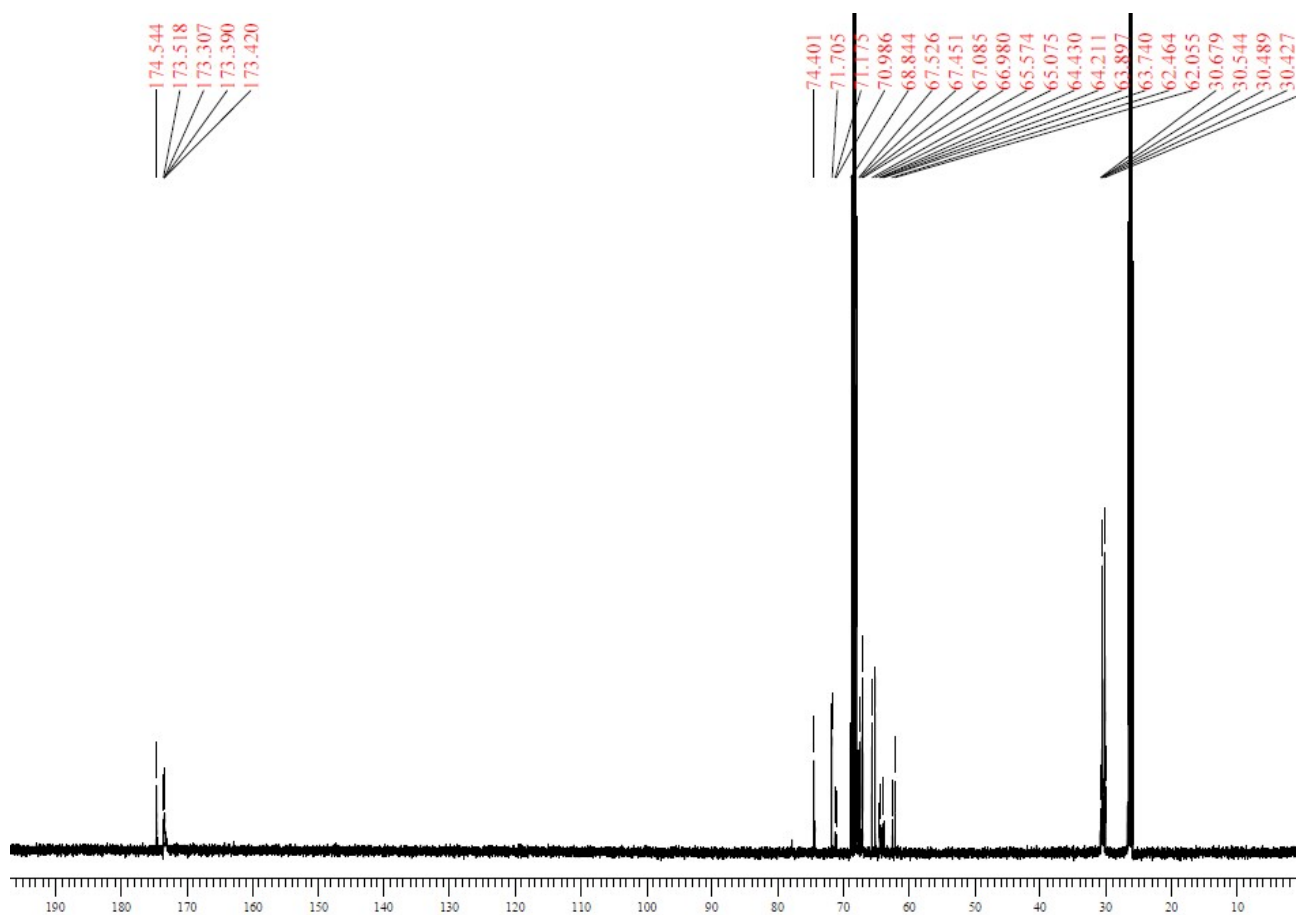

**Figure.S17**  $^{13}\text{C}$ -NMR analysis of GSA-03 polymer in Tetrahydrofuran- $\text{d}_8$ <sup>1</sup>



## Supplementary Studies of Mass structures

The figure *S18* (A-G) shows the experimental mass signals with relative isotopic patterns (blue traces), compared with the theoretical ones (red traces) suggested by the software. It is easy to see high degree of overlap. Moreover, the software provides a possible molecular formula. As expected, the formation of the adduct with the Na<sup>+</sup> cation is preponderant among all oligomers. All measured m/z values have a deviation of less than 15 ppm compared to the theoretical ones and in some cases less than 2 ppm allowing us to have a solid certainty on the attributions of the various signals. A further verification was the analysis of the isotopic patterns, also in this case the software analysis provides to an additional confirmation of the nature of the signals.

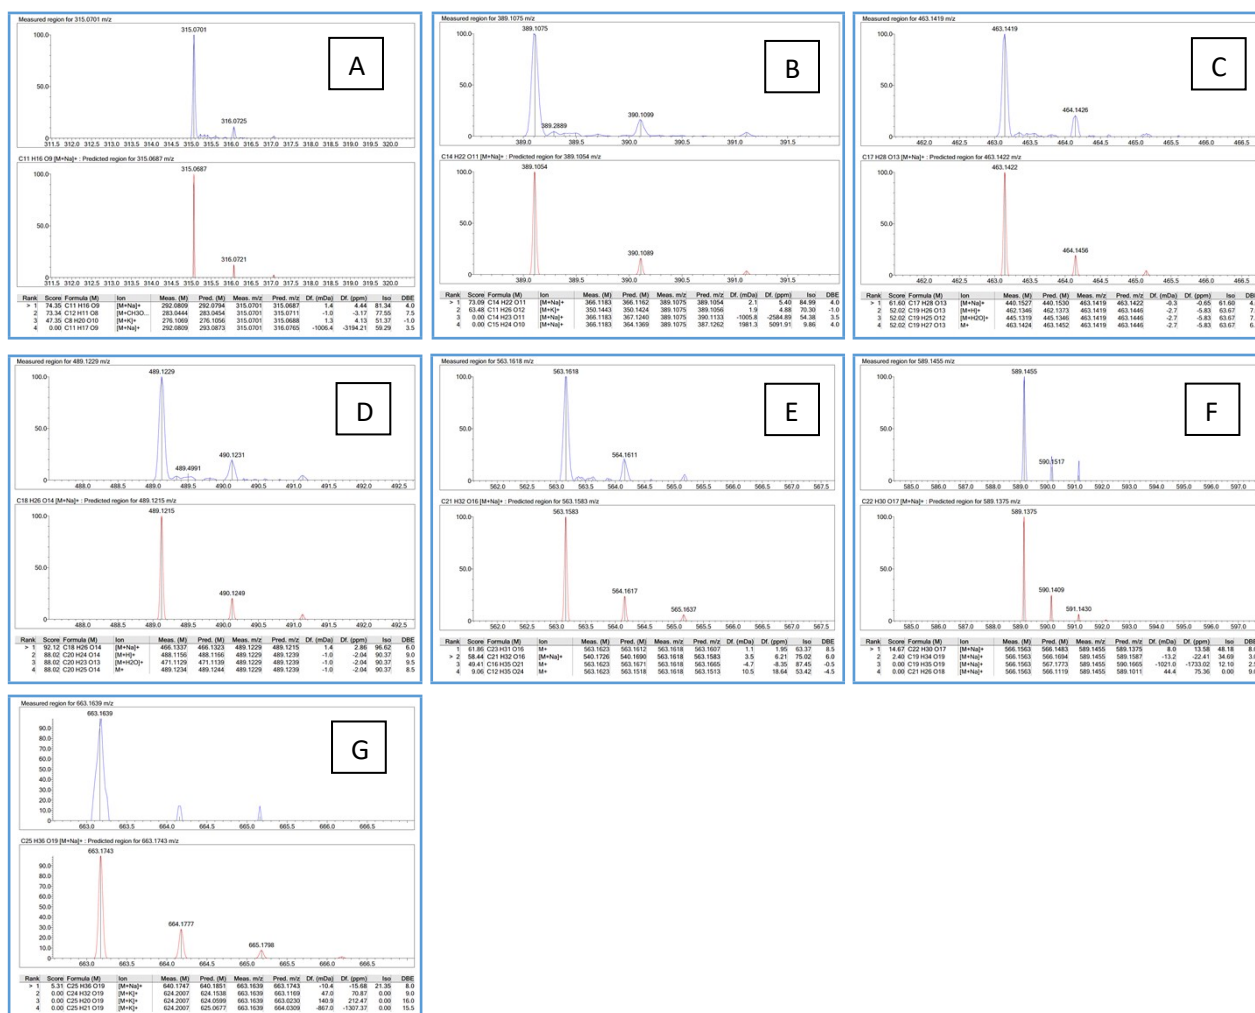

**Figure S18:** Isotopic pattern comparison

**Table S3:** List of determined oligomers

| <b>Oligomers</b> | <b>Molecular formula</b>                        | <b>Exact Mass (molecular ion)</b> | <b>Predicted Mass (Na adduct)</b> | <b>Measured Mass</b> | <b>Diff ppm</b> |
|------------------|-------------------------------------------------|-----------------------------------|-----------------------------------|----------------------|-----------------|
| <i>A</i>         | C <sub>11</sub> H <sub>16</sub> O <sub>9</sub>  | 292.0809                          | 315.0687                          | 315.0701             | 4.44            |
| <i>B</i>         | C <sub>14</sub> H <sub>22</sub> O <sub>11</sub> | 366.1183                          | 389.1054                          | 389.1075             | 5.40            |
| <i>C</i>         | C <sub>17</sub> H <sub>28</sub> O <sub>13</sub> | 440.1527                          | 463.1422                          | 463.1419             | -0.65           |
| <i>D</i>         | C <sub>18</sub> H <sub>26</sub> O <sub>14</sub> | 466.1337                          | 489.1215                          | 489.1229             | 2.86            |
| <i>E</i>         | C <sub>21</sub> H <sub>32</sub> O <sub>16</sub> | 540.1726                          | 563.1583                          | 563.1618             | 6.21            |
| <i>F</i>         | C <sub>22</sub> H <sub>30</sub> O <sub>17</sub> | 566.1563                          | 589.1375                          | 589.1455             | 13.58           |
| <i>G</i>         | C <sub>25</sub> H <sub>36</sub> O <sub>19</sub> | 640.1747                          | 663.1743                          | 663.1639             | -15.68          |

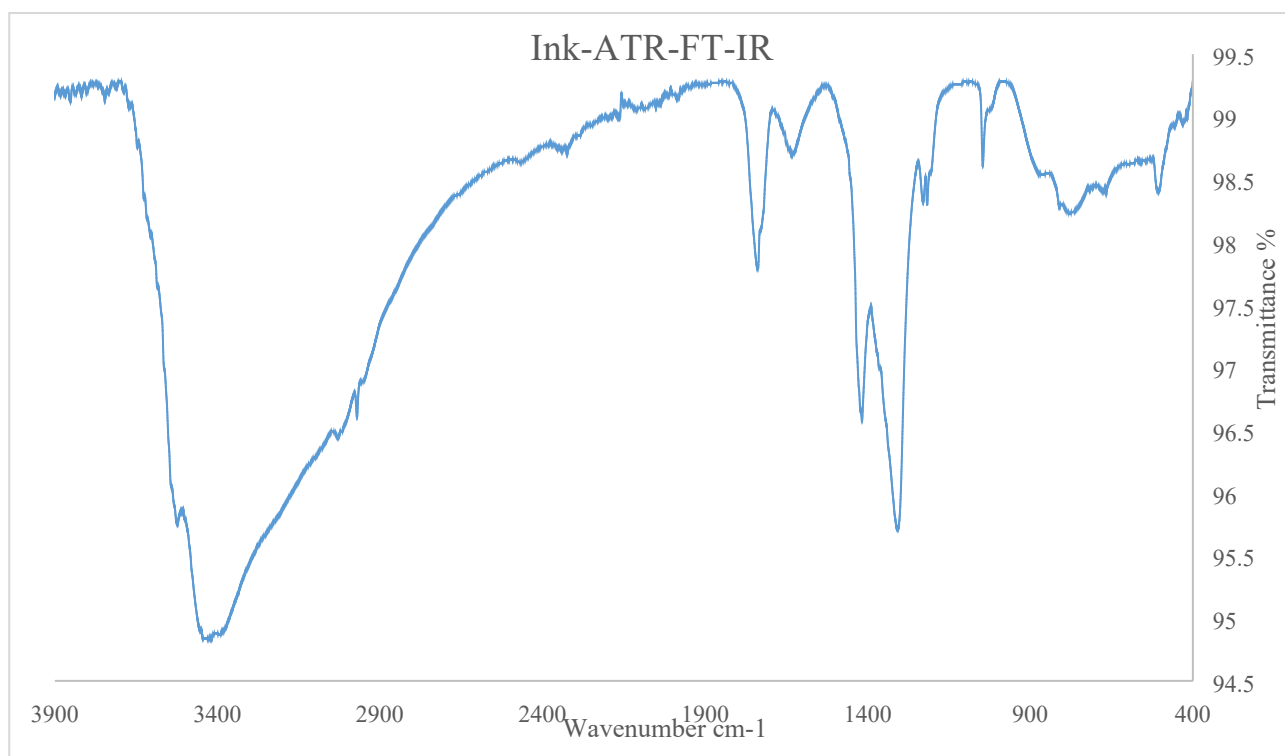

**Figure S19.** Ink ATR-FT-IR analysis

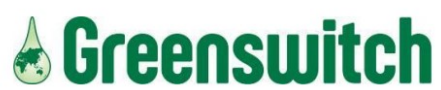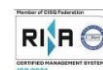

|                        |                            |
|------------------------|----------------------------|
| DESCRIZIONE            | Raw glycerol from FAMES 70 |
| LUOGO DI FABBRICAZIONE | Ferrandina ( MT )          |

| <b>Composition</b>            | <b>(%weight)</b> |
|-------------------------------|------------------|
| glycerol                      | 65-70            |
| water                         | 15               |
| MONG (organic material No Gly | 5                |
| Methanol                      | 1                |
| KCl                           | 5-10             |

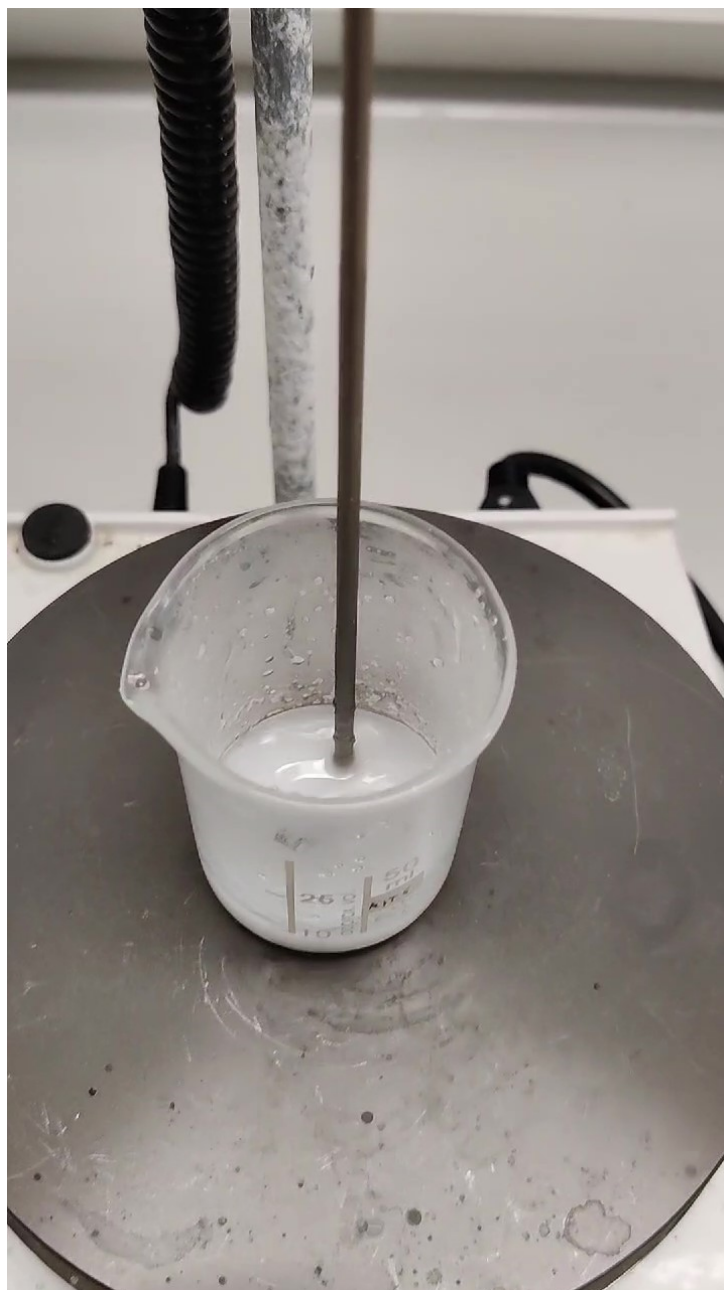

*Figure S20.* Picture of the reactor

*Additional references*

M. Agach, S. Delbaere, S. Marinkovic·B. Estrine, V. Nardello-Rataj *Polym. Degrad. Stab.* 2012, **97**, 1956.
