# Supplementary figures and images for: A new scandium based catalyst for the green synthesis of polyols-polyesters starting from waste raw materials
Source: Royal Society of Chemistry journal article supplement (doi:10.1039/d4gc03033h), 2024-01-01

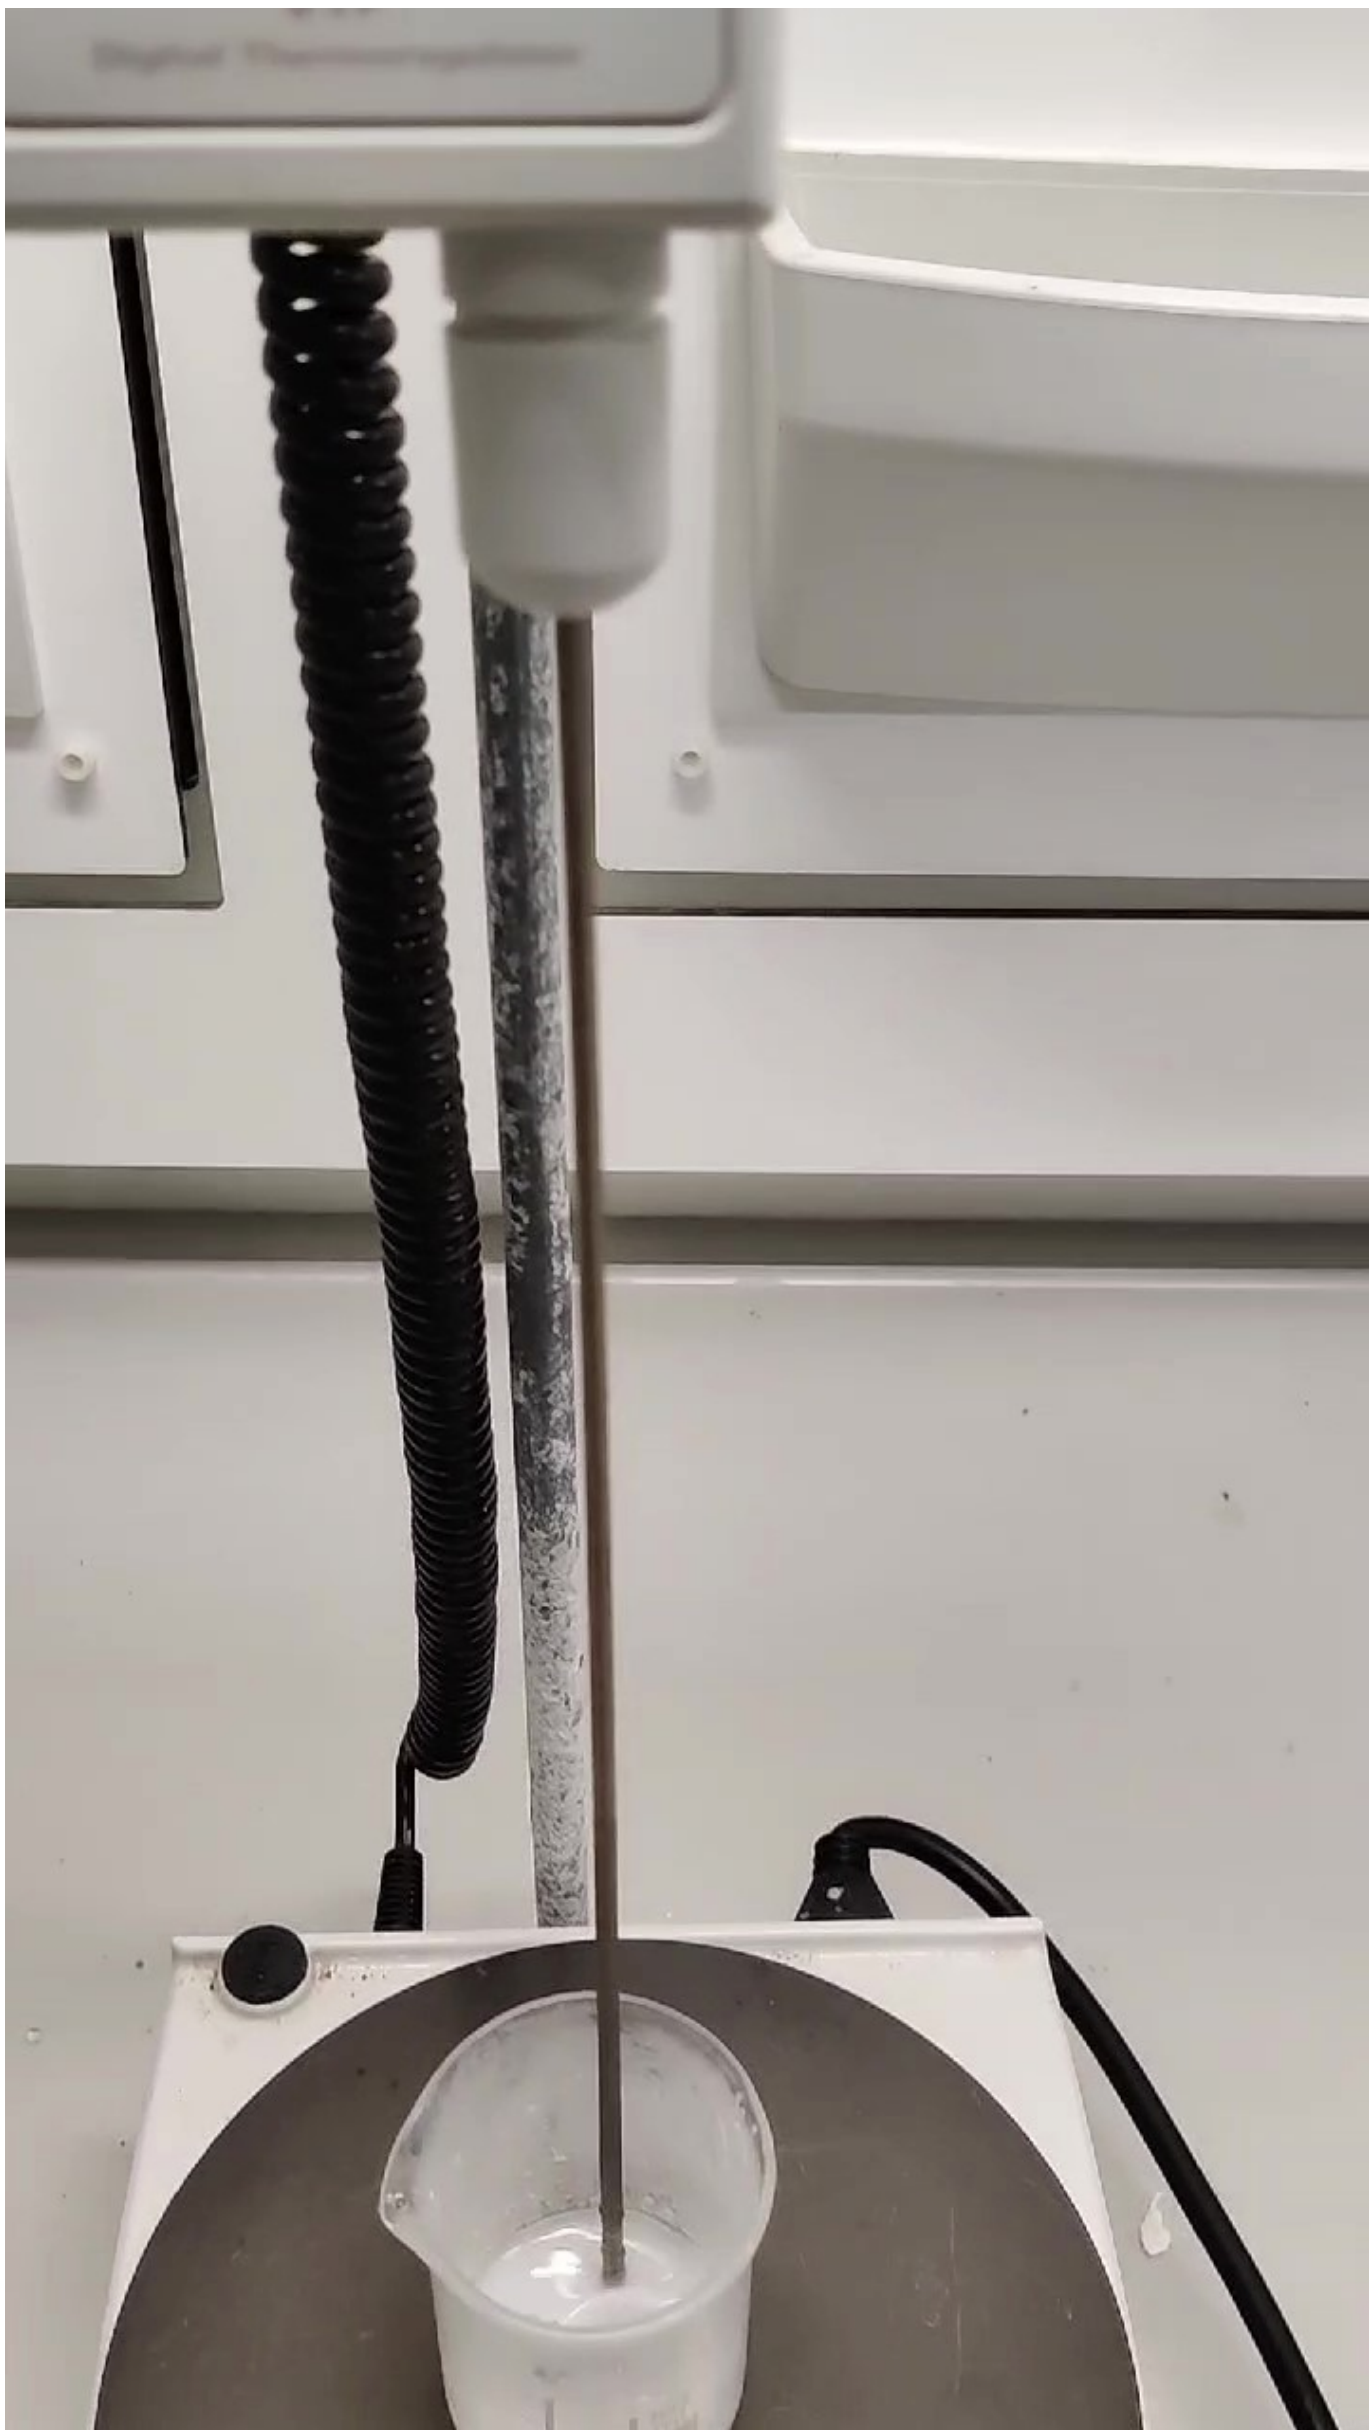

Supplement: d4gc03033h2.pdf [file d4gc03033h2.pdf]
